# Supplementary material
Source: ML conference proceedings conference paper supplement (https://aclanthology.org/K19-1078)
Supplement: Supplementary_Material [file CONLL19___Supplementary__Formality_Tailored_Summary_Generation.pdf › CONLL19___Supplementary__Formality_Tailored_Summary_Generation.pdf]

# Supplementary Material: Generating Formality-tuned Summaries Using Input-dependent Rewards

**Kushal Chawla\***

University of Southern California  
Los Angeles, CA, USA  
kchawla@usc.edu

**Balaji Vasan Srinivasan, Niyati Chhaya**

Adobe Research  
Bangalore, India  
balsrini, nchhaya@adobe.com

## A Sample ground-truth summaries

Table 1 shows some sample ground-truth summaries from our training dataset, comprising summaries from both CNN/DM and TL;DR datasets. The formality scores are based on the formality oracle defined in the paper. We found the summaries with greater than  $-0.5$  score to be reasonably formal in general.

| Summary                                                                                                                                                                                                                                                                                                                                                                        | Formality score |
|--------------------------------------------------------------------------------------------------------------------------------------------------------------------------------------------------------------------------------------------------------------------------------------------------------------------------------------------------------------------------------|-----------------|
| photographer matika wilbur travelled miles to capture the series of exquisite portraits for project . the former journalist visited different nations to celebrate indigenous tribes . the images show 21st century descendants of ancient tribes in their everyday environments . the photos are part of a project to combat racism and create interest in native americans . | +0.98           |
| political scientist viktor svyatsky was beaten by two men in kiev . he said his attackers threatened further violence against female members . they warned of violence if protestors hijack religious celebrations in kiev . the celebrations which take place tomorrow will be attended by vladimir putin .                                                                   | +0.41           |
| formula one team caterham went into administration in october . the team ran into financial troubles despite high hopes . their final assets are being sold off over next few weeks .                                                                                                                                                                                          | +0.04           |
| my mother is the most inspiring practitioner . she was my birth mother . she gave me life . this she did for only two people . she was also my dhamma truth mother . she showed me the truth . this she did for many people .                                                                                                                                                  | -0.50           |
| 5'11 , 323.6 pound 26 year old guy doing vlc paleo and looking for advice on a good fitness program when to start one . goal weight of 185 with 12% or less bf .                                                                                                                                                                                                               | -0.99           |

Table 1: Sample ground-truth summaries from our training dataset along with their formality scores.

---

\* Work done when author was a full time employee at Adobe Research
